# Supplementary material for: Machine learning-based label-free macrophage phenotyping in immune-material interactions
Source: Royal Society of Chemistry journal article supplement (doi:10.1039/d5tb00365b), 2025-01-01
Supplement: d5tb00365b1.pdf [file d5tb00365b1.pdf]

## Supplementary Information

### Machine Learning-Based Label-Free Macrophage Phenotyping in Immune-Material Interactions

Chawalwat Martkamjan<sup>1,2,#</sup>, Kornlavit Lerdsudkanung<sup>1,2,#</sup>, Paul Sean Tipay<sup>3</sup>, Rachid Rezgui<sup>4</sup>,  
Jeremy C.M. Teo<sup>2,\*</sup>, Jiranuwat Sapudom<sup>2,\*</sup>

<sup>1</sup> International School of Engineering, Faculty of Engineering, Chulalongkorn University, Bangkok, Thailand

<sup>2</sup> Laboratory for Immuno Bioengineering Research and Applications, Division of Engineering, New York University Abu Dhabi, Abu Dhabi, UAE

<sup>3</sup> Independent Researcher, Abu Dhabi, UAE

<sup>4</sup> Core Technology Platform - Light Microscopy, New York University Abu Dhabi, Abu Dhabi, UAE

# Contribute equally to the work

\* Corresponding authors

Jeremy Teo: [jeremy.teo@nyu.edu](mailto:jeremy.teo@nyu.edu)

Jiranuwat Sapudom: [jiranuwat.sapudom@nyu.edu](mailto:jiranuwat.sapudom@nyu.edu)

**Supplementary Table 1:** Antibodies used in the study. All antibodies were purchased from Biolegend.

| Marker | Color/Format         | Host/Target      | Isotype | Clone  | Catalog Nr. |
|--------|----------------------|------------------|---------|--------|-------------|
| CD105  | Alexa Fluor 647      | Mouse anti-Human | IgG1 κ  | 43A3   | 323212      |
| CD163  | PE-Cy7               | Mouse anti-Human | IgG1 κ  | GHI/61 | 333614      |
| CD206  | Brilliant Violet 510 | Mouse anti-Human | IgG1 κ  | 15-2   | 321138      |
| HLA-DR | Alexa Fluor 488      | Mouse anti-Human | IgG2a κ | L243   | 307656      |

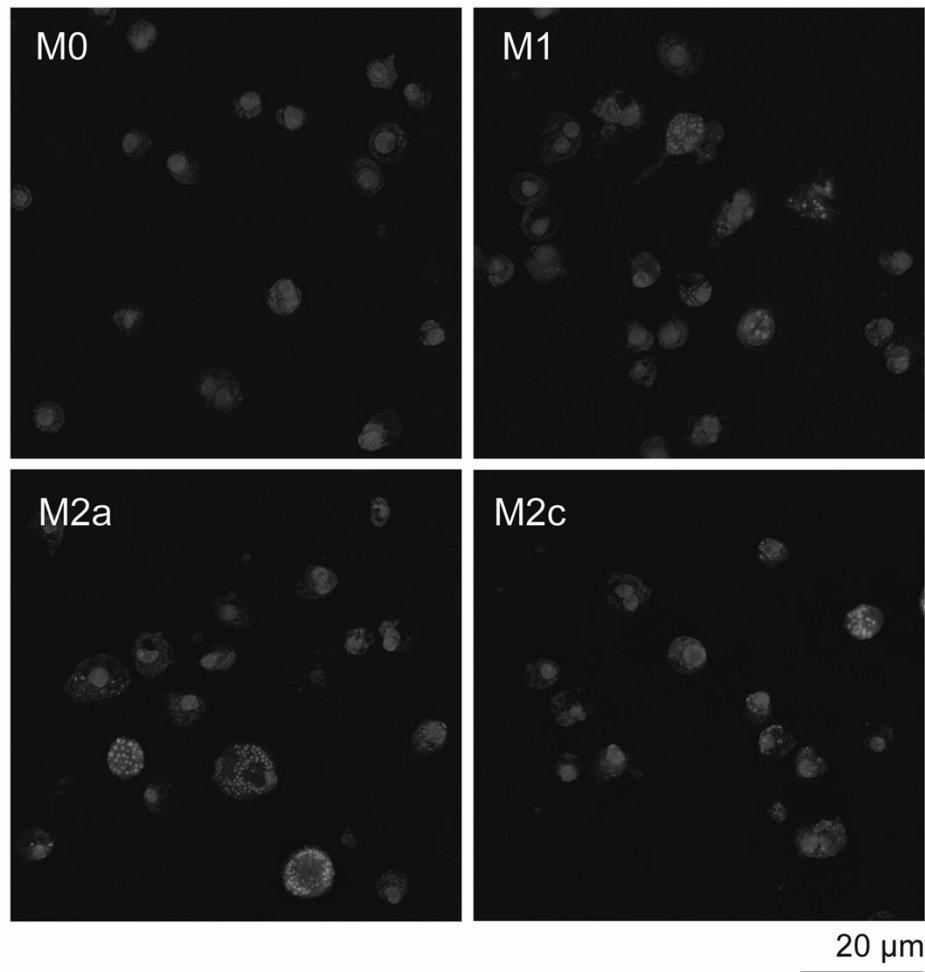

**Supplementary Figure S1. Representative QPI overview images of macrophage phenotypes.** Quantitative phase images showing macrophages in four distinct phenotypic states: M0, M1, M2a, and M2c. Each image captures a broader field of view, illustrating the larger number of cells included in the analysis. Scale bar: 20  $\mu\text{m}$ .

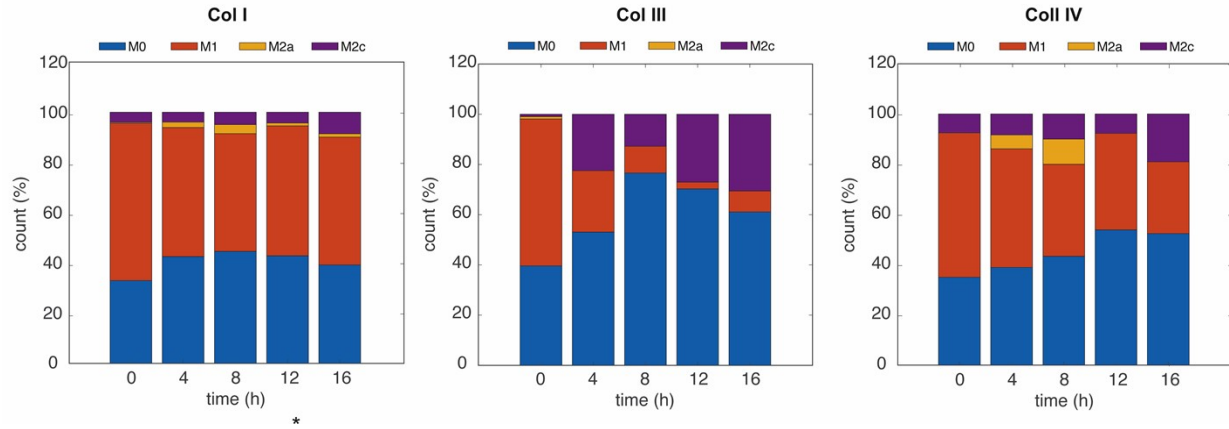

**Supplementary Figure S2: Dynamic analysis of macrophage phenotype adaptation on different collagen substrates over time.** Dynamic analysis of macrophage phenotype adaptation on different collagen substrates over time. Stacked bar plots represent the relative proportions of macrophage phenotypes (M0 – Blue, M1 – Orange, M2a – Yellow, M2c – Purple) at different time points (0, 4, 8, 12, and 16 hours) on (A) Col I, (B) Col III, and (C) Col IV. The distribution of phenotypes varies depending on the collagen type, highlighting the influence of extracellular matrix composition on macrophage polarization dynamics.
